# Supplementary material for: The burden of asthma, hay fever and eczema in children in 25 countries: GAN Phase I study
Source: PubMed Central journal article supplement — Eur Respir J. 2022 Sep 15;60(3):2102866. doi: 10.1183/13993003.02866-2021 (PMC9474895; doi:10.1183/13993003.02866-2021), 2022-09-15
Supplement: ERJ-02866-2021.Table_S2.pdf [file ERJ-02866-2021.Table_S2.pdf]

Supplementary table S2: Prevalence of asthma indicators among children in the Global Asthma Network Phase I (GAN Phase I) by centre (2015-2020).

| Country                                    | Centre                   | Mean date data collection | Number of participants | Wheeze in the past 12 months |       | Asthma ever |       | Severe asthma Symptoms in the past 12 months |       |             | Exercise wheeze in the past 12 months |       | Night cough in the past 12 months |       |
|--------------------------------------------|--------------------------|---------------------------|------------------------|------------------------------|-------|-------------|-------|----------------------------------------------|-------|-------------|---------------------------------------|-------|-----------------------------------|-------|
|                                            |                          |                           |                        | N                            | %     | N           | %     | N                                            | %     | % of wheeze | N                                     | %     | N                                 | %     |
| <b>Africa and Eastern Mediterranean</b>    |                          |                           |                        |                              |       |             |       |                                              |       |             |                                       |       |                                   |       |
| Cameroon                                   | Yaounde                  | feb-19                    | 722                    | 46                           | 6.4%  | 13          | 1.8%  | 20                                           | 2.8%  | 43.5%       | 27                                    | 3.7%  | 147                               | 20.4% |
| Iran                                       | Karaj                    | feb-20                    | 572                    | 79                           | 13.8% | 56          | 9.8%  | 32                                           | 5.6%  | 40.5%       | 57                                    | 10.0% | 274                               | 47.9% |
| Iran                                       | Yazd                     | jun-20                    | 2526                   | 148                          | 5.9%  | 88          | 3.5%  | 39                                           | 1.5%  | 26.4%       | 99                                    | 3.9%  | 280                               | 11.1% |
| Kingdom of Saudi Arabia                    | Saudi Arabia             | mar-19                    | 3614                   | 377                          | 10.4% | 500         | 13.8% | 188                                          | 5.2%  | 49.9%       | 242                                   | 6.7%  | 685                               | 19.0% |
| Syrian Arab Republic                       | Lattakia                 | may-19                    | 1116                   | 121                          | 10.8% | 133         | 11.9% | 60                                           | 5.4%  | 49.6%       | 129                                   | 11.6% | 325                               | 29.1% |
|                                            | Regional total           |                           | 8550                   | 771                          | 9.0%  | 790         | 9.2%  | 339                                          | 4.0%  | 44.0%       | 554                                   | 6.5%  | 1711                              | 20.0% |
| <b>America</b>                             |                          |                           |                        |                              |       |             |       |                                              |       |             |                                       |       |                                   |       |
| Costa Rica                                 | Costa Rica               | jan-18                    | 1936                   | 449                          | 23.2% | 567         | 29.3% | 256                                          | 13.2% | 57.0%       | 237                                   | 12.2% | 889                               | 45.9% |
| Honduras                                   | Tegucigalpa              | jun-18                    | 361                    | 41                           | 11.4% | 54          | 15.0% | 25                                           | 6.9%  | 61.0%       | 26                                    | 7.2%  | 49                                | 13.6% |
| México                                     | Aguascalientes           | aug-16                    | 3176                   | 347                          | 10.9% | 306         | 9.6%  | 179                                          | 5.6%  | 51.6%       | 375                                   | 11.8% | 622                               | 19.6% |
| México                                     | Chihuahua                | may-16                    | 1969                   | 203                          | 10.3% | 164         | 8.3%  | 94                                           | 4.8%  | 46.3%       | 220                                   | 11.2% | 425                               | 21.6% |
| México                                     | Ciudad Juárez            | apr-16                    | 2118                   | 187                          | 8.8%  | 90          | 4.2%  | 89                                           | 4.2%  | 47.6%       | 228                                   | 10.8% | 418                               | 19.7% |
| México                                     | Ciudad Victoria          | feb-16                    | 2444                   | 285                          | 11.7% | 160         | 6.5%  | 142                                          | 5.8%  | 49.8%       | 245                                   | 10.0% | 555                               | 22.7% |
| México                                     | Córdoba                  | jul-16                    | 2746                   | 307                          | 11.2% | 182         | 6.6%  | 131                                          | 4.8%  | 42.7%       | 237                                   | 8.6%  | 540                               | 19.7% |
| México                                     | Matamoros                | feb-16                    | 806                    | 86                           | 10.7% | 49          | 6.1%  | 41                                           | 5.1%  | 47.7%       | 54                                    | 6.7%  | 155                               | 19.2% |
| México                                     | Mexicali                 | mar-16                    | 2001                   | 280                          | 14.0% | 150         | 7.5%  | 152                                          | 7.6%  | 54.3%       | 296                                   | 14.8% | 461                               | 23.0% |
| México                                     | México City (North Area) | jun-16                    | 2515                   | 266                          | 10.6% | 129         | 5.1%  | 109                                          | 4.3%  | 41.0%       | 230                                   | 9.1%  | 498                               | 19.8% |
| México                                     | Michoacán                | oct-16                    | 2166                   | 175                          | 8.1%  | 82          | 3.8%  | 82                                           | 3.8%  | 46.9%       | 162                                   | 7.5%  | 354                               | 16.3% |
| México                                     | Oaxaca                   | oct-17                    | 1329                   | 112                          | 8.4%  | 47          | 3.5%  | 42                                           | 3.2%  | 37.5%       | 100                                   | 7.5%  | 199                               | 15.0% |
| México                                     | Puerto Vallarta          | jan-17                    | 2241                   | 367                          | 16.4% | 203         | 9.1%  | 203                                          | 9.1%  | 55.3%       | 235                                   | 10.5% | 631                               | 28.2% |
| México                                     | San Luis Potosí          | jul-16                    | 2108                   | 178                          | 8.4%  | 118         | 5.6%  | 73                                           | 3.5%  | 41.0%       | 198                                   | 9.4%  | 447                               | 21.2% |
| México                                     | Tijuana                  | apr-16                    | 2082                   | 218                          | 10.5% | 105         | 5.0%  | 102                                          | 4.9%  | 46.8%       | 162                                   | 7.8%  | 450                               | 21.6% |
| México                                     | Toluca Rural             | jan-16                    | 2976                   | 178                          | 6.0%  | 63          | 2.1%  | 75                                           | 2.5%  | 42.1%       | 214                                   | 7.2%  | 336                               | 11.3% |
| México                                     | Toluca Urban Area        | apr-16                    | 2712                   | 174                          | 6.4%  | 93          | 3.4%  | 79                                           | 2.9%  | 45.4%       | 177                                   | 6.5%  | 488                               | 18.0% |
| México                                     | Xalapa                   | feb-17                    | 3717                   | 346                          | 9.3%  | 200         | 5.4%  | 168                                          | 4.5%  | 48.6%       | 273                                   | 7.3%  | 599                               | 16.1% |
| Nicaragua                                  | Managua                  | nov-18                    | 3162                   | 385                          | 12.2% | 444         | 14.0% | 188                                          | 5.9%  | 48.8%       | 249                                   | 7.9%  | 1029                              | 32.5% |
|                                            | Regional total           |                           | 42565                  | 4584                         | 10.8% | 3206        | 7.5%  | 2230                                         | 5.2%  | 48.6%       | 3918                                  | 9.2%  | 9145                              | 21.5% |
| <b>Europe</b>                              |                          |                           |                        |                              |       |             |       |                                              |       |             |                                       |       |                                   |       |
| Kosovo                                     | Peja                     | may-18                    | 1441                   | 61                           | 4.2%  | 29          | 2.0%  | 17                                           | 1.2%  | 27.9%       | 30                                    | 2.1%  | 188                               | 13.0% |
| Russia                                     | Tyumen                   | apr-19                    | 2969                   | 89                           | 3.0%  | 243         | 8.2%  | 47                                           | 1.6%  | 52.8%       | 30                                    | 1.0%  | 188                               | 6.3%  |
| Spain                                      | A Coruña                 | jan-19                    | 3407                   | 374                          | 11.0% | 332         | 9.7%  | 151                                          | 4.4%  | 40.4%       | 166                                   | 4.9%  | 1054                              | 30.9% |
| Spain                                      | Bilbao                   | ago-18                    | 2707                   | 295                          | 10.9% | 615         | 22.7% | 111                                          | 4.1%  | 37.6%       | 174                                   | 6.4%  | 752                               | 27.8% |
| Spain                                      | Cantabria                | jan-18                    | 2841                   | 324                          | 11.4% | 490         | 17.2% | 125                                          | 4.4%  | 38.6%       | 162                                   | 5.7%  | 851                               | 30.0% |
| Spain                                      | Cartagena                | jan-16                    | 3509                   | 411                          | 11.7% | 362         | 10.3% | 153                                          | 4.4%  | 37.2%       | 213                                   | 6.1%  | 960                               | 27.4% |
| Spain                                      | Salamanca                | sep-17                    | 2388                   | 219                          | 9.2%  | 191         | 8.0%  | 70                                           | 2.9%  | 32.0%       | 103                                   | 4.3%  | 544                               | 22.8% |
|                                            | Regional total           |                           | 19262                  | 1773                         | 9.2%  | 2262        | 11.7% | 674                                          | 3.5%  | 38.0%       | 878                                   | 4.6%  | 4537                              | 23.5% |
| <b>South-East Asia and Western Pacific</b> |                          |                           |                        |                              |       |             |       |                                              |       |             |                                       |       |                                   |       |
| India                                      | Bikaner                  | dec-17                    | 2600                   | 9                            | 0.3%  | 8           | 0.3%  | 1                                            | 0.0%  | 11.1%       | 7                                     | 0.3%  | 32                                | 1.2%  |

|                |                 |        |        |      |       |      |       |      |      |       |      |       |       |       |
|----------------|-----------------|--------|--------|------|-------|------|-------|------|------|-------|------|-------|-------|-------|
| India          | Chandigarh      | oct-17 | 2473   | 211  | 8.5%  | 32   | 1.3%  | 29   | 1.2% | 13.7% | 153  | 6.2%  | 780   | 31.5% |
| India          | Jaipur          | nov-17 | 2296   | 54   | 2.4%  | 50   | 2.2%  | 18   | 0.8% | 33.3% | 57   | 2.5%  | 456   | 19.9% |
| India          | Kottayam        | dec-17 | 2099   | 115  | 5.5%  | 73   | 3.5%  | 60   | 2.9% | 52.2% | 38   | 1.8%  | 439   | 20.9% |
| India          | Lucknow         | oct-17 | 2969   | 33   | 1.1%  | 18   | 0.6%  | 14   | 0.5% | 42.4% | 57   | 1.9%  | 200   | 6.7%  |
| India          | Mysuru (Mysore) | nov-17 | 2730   | 75   | 2.7%  | 47   | 1.7%  | 38   | 1.4% | 50.7% | 71   | 2.6%  | 282   | 10.3% |
| India          | New Delhi (7)   | jan-18 | 2516   | 87   | 3.5%  | 11   | 0.4%  | 19   | 0.8% | 21.8% | 67   | 2.7%  | 575   | 22.9% |
| India          | Pune            | oct-17 | 2404   | 50   | 2.1%  | 44   | 1.8%  | 17   | 0.7% | 34.0% | 105  | 4.4%  | 476   | 19.8% |
| New Zealand    | Auckland        | jul-18 | 1538   | 267  | 17.4% | 296  | 19.2% | 103  | 6.7% | 38.6% | 185  | 12.0% | 382   | 24.8% |
| Sri Lanka      | Anuradhapura    | nov-18 | 2180   | 217  | 10.0% | 122  | 5.6%  | 76   | 3.5% | 35.0% | 104  | 4.8%  | 234   | 10.7% |
| Sri Lanka      | Peradeniya      | nov-18 | 1492   | 179  | 12.0% | 124  | 8.3%  | 56   | 3.8% | 31.3% | 75   | 5.0%  | 145   | 9.7%  |
| Taiwan         | Taipei          | oct-17 | 3036   | 413  | 13.6% | 441  | 14.5% | 111  | 3.7% | 26.9% | 208  | 6.9%  | 995   | 32.8% |
| Thailand       | Bangkok         | aug-17 | 3067   | 449  | 14.6% | 186  | 6.1%  | 208  | 6.8% | 46.3% | 93   | 3.0%  | 743   | 24.2% |
| Regional Total |                 |        | 31400  | 2159 | 6.9%  | 1452 | 4.6%  | 750  | 2.4% | 34.7% | 1220 | 3.9%  | 5739  | 18.3% |
| Global total   |                 |        | 101777 | 9287 | 9.1%  | 7710 | 7.6%  | 3993 | 3.9% | 43.0% | 6570 | 6.4%  | 21132 | 20.8% |

Notes: Centres not included in the analyses: Guatemala City (Guatemala), Katowice (Poland), Monterrey (México) and Salta (Argentina) due to participation rates lower than 50%; and Guadalajara (México) and Kolkata (India) due to major inconsistencies in the answers to the questionnaire. Number of participants and response rate affected by civil war (Yaounde). Number of participants affected by COVID (Karaj). No age on questionnaire (New Delhi [7]). <10 schools participated when >10 schools available (Bangkok, Lattakia). >20% of questionnaires missing age and date of birth (Bangkok). Response rate <70% (Costa Rica, Bilbao, Cartagena, Kottayam, Auckland). No date of birth on questionnaire (Taipei). <1000 participants (Tegucigalpa, Matamoros).
